1 **Comparative transcriptomics reveal that adaptive evolution in immune**  
2 **genes drives the local adaptation and speciation of schizothoracine fish**

3 Delin Qi<sup>a\*</sup>, Rongrong Wu<sup>a, b</sup>, Yan Chao<sup>b</sup>, Mingzhe Xia<sup>a</sup>, Qichang Chen<sup>a</sup>, Zhiqin Zheng<sup>a</sup>

4

5

6

7 <sup>a</sup> State Key Laboratory of Plateau Ecology and Agriculture, Qinghai University, Xining 810016,  
8 China

9 <sup>b</sup> Animal Science Department of Agriculture and Animal Husbandry College, Qinghai  
10 University, Xining 810016, China

11

12

13 \* Corresponding Author: State Key Laboratory of Plateau Ecology and Agriculture, Qinghai  
14 University, Xining 810016, China.

15 E-mail address: [delinqi@126.com](mailto:delinqi@126.com) (D. Qi).

16

17 Supplemental material available at FigShare: <https://doi.org/10.25387/>.

18

19

20

21

22

23

24

25

1 **ABSTRACT** Transcriptomic information can increase our understanding of the molecular  
2 processes underlying speciation. The schizothoracine fish, the largest and most diverse taxon  
3 within the Qinghai-Tibetan Plateau (QTP) ichthyofauna, are widespread in drainages  
4 throughout the QTP. These fish thus serve as an ideal model group with which to investigate  
5 how molecular evolution drives local adaptation during speciation. Here, we performed an  
6 interspecific comparative analysis of the transcriptomes of 13 schizothoracine fish species,  
7 and identified the key positively selected genes (PSGs) associated with significantly enriched  
8 functions and metabolite pathway acting on the specific lineages (or species) in the  
9 schizothoracine fish. We generated 64,637,602–83,968,472 sequence reads per  
10 schizothoracine fish species using Illumina sequencing, yielding 95,251–145,805 unigenes  
11 per species. We identified 52 out of 2,064 orthologous genes as candidate genes, which have  
12 probably been subject to positive selection along the whole schizothoracine fish lineage. Nine  
13 of these candidate genes were significantly enriched in key GO functions and metabolite  
14 pathways, all of which were associated with the immune system. The lineage-specific  
15 evolution test showed species-specific differences among the nine candidate PSGs, probably  
16 due to ecological differences among drainages, as well as among micro-habitats in the same  
17 drainage (e.g., benthic and pelagic). Here, we provide evidence that the adaptive evolution of  
18 immune genes, along with the uplift of the QTP, allowed new schizothoracine species to  
19 colonize ecologically novel environments or to exploit vacant ecological niches during  
20 speciation.

21 **KEYWORDS:** Schizothoracine fish, the Qinghai-Tibetan Plateau, Transcriptome, Positive  
22 selection, Adaptation

23

24

25

1 The processes and mechanisms of speciation have long been a major question in evolutionary  
2 biology (Funk et al. 2002; Rocha et al. 2005; Baack and Stanton 2005; Tonnis et al. 2005; Nosil  
3 et al. 2009; Malinsky et al. 2015). Local adaptations, driven by small-scale ecological niches,  
4 often result in adaptive phenotypes and the genetic divergence of geographically isolated  
5 populations (Baack and Stanton 2005; Nosil et al. 2009; Collin and Fumagalli 2011). The  
6 accumulation of genetic differences may lead to the formation of new taxon (Zhang et al. 2013;  
7 Collin and Fumagalli 2011; Nosil et al. 2009; Kirkpatrick and Barton 2006). Genetic  
8 divergences associated with local adaptations allow species to colonize ecologically novel  
9 environments or to exploit vacant ecological niches, and thus play an important role in  
10 speciation (Zhou et al. 2012; Yang et al. 2014; Kang et al. 2017; Tong et al. 2017; Cai et al.  
11 2013; Qu et al. 2013). Freshwater fish, especially fish lineages distributed in different  
12 ecological drainage systems within a given region, have provided key insights into the  
13 mechanisms whereby molecular evolution drives local adaptation during speciation (Yang et  
14 al. 2016; Kang et al. 2017; Tong et al. 2017; Tong et al. 2015; Ma et al. 2015; Guan et al. 2014;  
15 Xu et al. 2017).

16 Schizothoracine fish (Teleostei: Cyprinidae) are the largest and most diverse taxon within  
17 the Qinghai-Tibetan Plateau (QTP) ichthyofauna, including more than 70 recognized species  
18 (Wu and Wu 1992; Chen and Cao 2000). Schizothoracine fish are distributed throughout the  
19 majority of the drainage basins in the QTP, 1500–5500 m above sea level (Qi et al. 2006; Wu  
20 and Wu 1992; Chen and Cao 2000). The distribution range of these fishes include the Yellow  
21 River, Yangtze River, Indus River, Mekong River, Tsangpo River, Salween River,  
22 Brahmaputra River, Qiadam Basin, and isolated lakes (Wu and Wu 1992; Chen and Cao  
23 2000). These water bodies represent rich ecological diversity and complexity (Wu and Wu  
24 1992; Qi et al. 2012). From an evolutionary perspective, the schizothoracine fish can be  
25 divided into three groups: primitive, specialized, and highly specialized, corresponding with  
26 three particular stages of QTP geological evolution (Cao et al. 1981). It has been  
27 demonstrated that the uplifting of the QTP from 50 MYA had a profound effect on paleo-  
28 drainage and stimulated many paleo-environmental changes in the plateau, thus promoting

1 the speciation of the schizothoracine fish endemic to this region and shaping current species  
2 distributions (Qi et al. 2012; Li et al. 2013). Due to the extensive ecological diversity of the  
3 distribution drainages, and because speciation events occurred during the short period of QTP  
4 uplift, the schizothoracine fish is an ideal model group with which to investigate how  
5 molecular evolution drives local adaptation during speciation. Previous studies, using  
6 transcriptomic comparisons between fish species endemic to the QTP and other fish species  
7 endemic to lowland areas, have provided evidence of the genetic adaptation of  
8 schizothoracine fish to high-altitude environments (Yang et al. 2014; Tong et al. 2015; Tong  
9 et al. 2017). However, previous studies have only focused on the adaptive genetic differences  
10 between QTP schizothoracine fish and low-altitude fish species; the potentially adaptive  
11 genetic differences among the schizothoracine fish remain unclear. In addition, previous  
12 studies have only included a single schizothoracine species, which may have been  
13 insufficient to fully characterize the genetic signals of local adaptation during speciation in  
14 this group.

15 In this study, we sequenced, assembled, and merged the transcriptomes of four tissues (head  
16 kidney, muscle, brain, and liver) from 13 schizothoracine species. We then conducted a  
17 comparative transcriptomic analysis to identify key positively selected genes (PSGs) associated  
18 with significantly enriched functions and metabolite pathways acting on specific lineages (or  
19 species) of schizothoracine fish. We aimed to provide evidence of the genetic adaptation of  
20 schizothoracine fish to their local aquatic environment, leading to speciation.

21

## 22 **MATERIALS AND METHODS**

### 23 **Experimental Animals**

24 Fish were collected from across their ranges using gill nets or cast nets (Figure 1). During field  
25 sampling, a blow to the head was used to stun fish. The liver, muscle, brain, and head kidney  
26 were then removed and frozen in liquid nitrogen until use. The specimens used in this study  
27 included 13 species, representing the primitive, specialized, and highly specialized groups of  
28 schizothoracine fishes. All of the procedures involving animals followed the guidelines of, and

1 were conducted under the approval of, the Animal Care and Use Committee, Qinghai  
2 University, China.

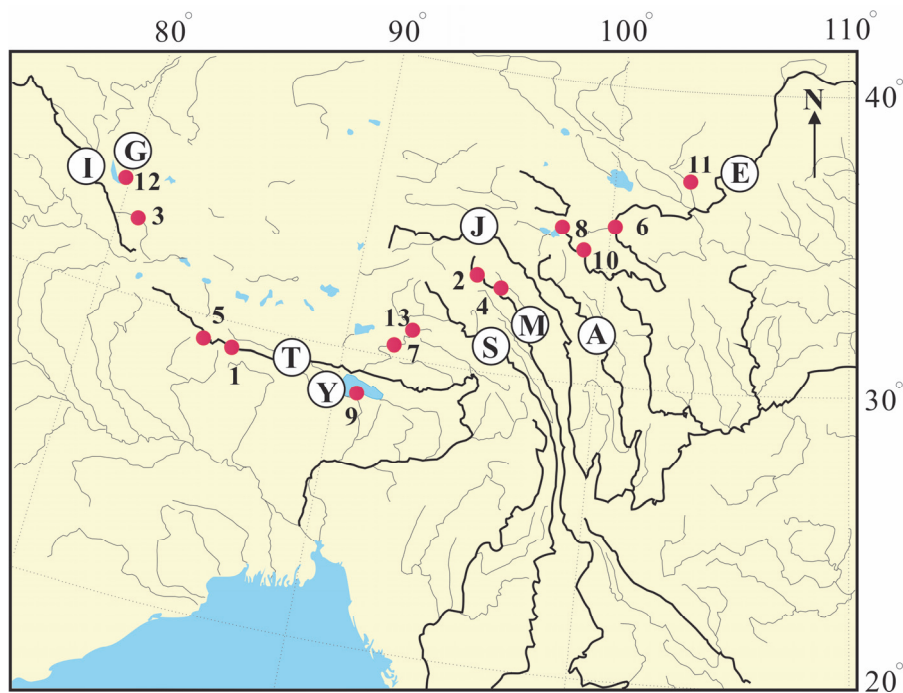

3  
4 **Figure 1** Location of fish sampling sites. Sites: A, Yalung River; E, Yellow River; G, Bangongco Lake; I,  
5 Indus River; J, Jinsha River; M, Mekong River; S, Salween River; T, Tsangpo River; Y, Yomzho Lake.  
6 Species sampled: 1, *Schizothorax macropogon*; 2, *Schizothorax lissolabiatius*; 3, *Schizothorax labiatius*; 4,  
7 *Schizothorax lantsangensis*; 5, *Ptychobarbus dipogon*; 6, *Gymnodiptychus pachycheilus*; 7, *Oxygymnocypris*  
8 *stewartii*; 8, *Gymnocypris eckloni*; 9, *Gymnocypris waddelli*; 10, *Platypharodon extremus*; 11,  
9 *Schizopygopsis pylzovi*; 12, *Schizopygopsis stoliczkai*; 13, *Schizopygopsis younghusbandi*.

### 10 **RNA extraction, Illumina library preparation, and sequencing**

11 Total RNA was isolated from each sample using the Ambion Magmax-96 total RNA  
12 isolation kit (Life Sciences, USA), following the manufacturer's instructions. RNA  
13 degradation and contamination was monitored using 1% agarose gels. RNA purity was  
14 checked using a Nano Photometer spectrophotometer (IMPLEN, CA, USA). RNA  
15 concentration was measured using Qubit RNA Assay Kits in a Qubit 2.0 Fluorometer (Life  
16 Technologies, CA, USA). A single pooled RNA sample, containing equal volumes of RNA  
17 from each organ (liver, muscle, brain and head kidney), was prepared for each species. We  
18 used 3.0  $\mu\text{g}$  of each pooled RNA sample used to prepare one Illumina sequencing library per  
19 species.

1 Sequencing libraries were generated using the NEBNext Ultra RNA Library Prep Kit for  
2 Illumina (NEB, USA), following manufacturer's instructions. Index codes were added to  
3 attribute sequences to each sample. PCR products were purified using an AMPure XP system  
4 (Beckman Coulter, USA) and library quality was assessed with a Bioanalyzer 2100 (Agilent).  
5 The index-coded samples were clustered with a cBot Cluster Generation System using a TruSeq  
6 PE Cluster Kit v3-cBot-HS (Illumina), following the manufacturer's instructions. After cluster  
7 generation, the library preparations were sequenced on an Illumina HiSeq 2500 platform,  
8 generating 125 bp paired-end reads. All sequence reads were deposited in the National Center  
9 for Biotechnology Information (NCBI) Sequence Read Archive database under bioproject  
10 number PRJNA494936.

### 11 **Quality control and de novo assembly**

12 Raw data (raw reads) were sorted by individual species and processed using self-written Perl  
13 scripts. In this step, data (reads) were cleaned by removing reads containing adapter  
14 sequences, reads containing ploy-N sequences, and low-quality reads. All of the downstream  
15 analyses were based on high-quality clean data. De novo transcriptome assembly was  
16 performed with the short read assembly program Trinity (Grabherr et al. 2011), with  
17 `min_kmer_cov` set to 2 by default and all of the other parameters set to default (Grabherr et  
18 al. 2011). In brief, reads of a certain length with overlapping areas were first joined to form  
19 longer fragments (contigs) without gaps. Then, paired-end reads were mapped back to  
20 contigs. Finally, the contigs were connected until sequences could no longer be extended.  
21 These sequences were termed unigenes.

### 22 **Transcriptome annotation**

23 All of the unigenes from the 13 schizothoracine fish were annotated against the NCBI non-  
24 redundant (Nr) protein database (<ftp://ftp.ncbi.nih.gov/blast/db/>) with BLAST (Altschul et al.  
25 1997), setting an E-value cut-off of 1E-5. We also used BLAST to align and annotate unigene  
26 sequences against the nucleotide (Nt) database (<ftp://ftp.ncbi.nih.gov/blast/db/>), the Clusters of  
27 Orthologous Groups of proteins (KOG) database (<ftp://ftp.ncbi.nih.gov/pub/COG/> KOG/),  
28 Swiss-Prot (<http://www.uniprot.org/>), the Kyoto Encyclopedia of Genes and Genomes (KEGG)

1 database (<http://www.genome.jp/kegg/>), and the Gene Ontology (GO) database  
2 (<http://www.geneontology.org/>). The results of the BLAST search against the GO database  
3 were imported into Blast2GO 3.2 (Gotz et al. 2008) for GO term mapping. The clusters of  
4 orthologous groups (COG) database were then used to identify putative functions for the  
5 unigenes, based on known orthologous gene products (Tatusov et al. 2003). The KEGG  
6 pathways were analyzed using the online KEGG Automatic Annotation Server  
7 (<http://www.genome.jp/kegg/kaas/>), with the bi-directional best-hit method and an E-value cut-  
8 off of 1E-10.

### 9 **Ortholog identification and sequence alignment**

10 Translated amino acid sequences from the 13 schizothoracine fish were used to construct a  
11 database, along with sequences from another two fish species: zebrafish (*Danio rerio*) and  
12 medaka (*Oryzias latipes*), obtained from the Ensembl database (release 89). Next, we used  
13 performed a self-to-self BLASTP against all of the amino acid sequences, with a E-value cutoff  
14 of  $1e^{-5}$ ; hits with identity < 30% and coverage < 30% were removed. One-to-one orthologs  
15 between 13 schizothoracine fish were determined using OrthoMCL v2.0.9 software (Li et al.  
16 2003) with default settings. Finally, putative single copy orthologs across the 13  
17 schizothoracine fish were obtained. For genes with multiple transcripts, the longest transcript  
18 was chosen. Each orthologous gene set was aligned using MUSCLE v. 3.8.31 (Edgar 2004),  
19 and trimmed using Gblocks (Castresana 2000) with the parameter “-t = c”. We deleted all of  
20 the gaps and ambiguous bases ("N") from the alignments to reduce the effects of these elements  
21 on positive selection inference. After this deletion process, trimmed alignments shorter than  
22 150 bp (50 codons) were discarded.

### 23 **Phylogeny construction and PSGs identification across the schizothoracine fish lineage**

24 We constructed a phylogenetic tree of the 13 schizothoracine fish using the concatenated  
25 orthologous sequences using a maximum-likelihood (ML) analysis in MEGA 6.0 (Tamura et  
26 al. 2013). The ML tree was then used in a PAML analysis (Yang 2007). We examined the  
27 schizothoracine fish phylogeny for evidence of natural selection by comparing non-  
28 synonymous/synonymous substitution ratios ( $\omega = K_a/K_s$ ), where  $\omega = 1$ , <1, and >1 indicated



1 neutral evolution, purifying selection, and positive selection, respectively (Yang and Nielsen  
2 2002; Yang et al. 2005). To determine how many orthologous genes had undergone positive  
3 selection across the whole lineage of schizothoracine fishes, we applied site-specific ML  
4 models using the codeml in PAML (version 4.7) (Yang 2007). Site-specific models that allowed  
5  $\omega$  to vary among sites were used to detect site-dependent evolution across the schizothoracine  
6 fish lineage. Thus, all the putative single-copy genes identified in the 13 schizothoracine fishes  
7 were separately tested for positive selection using the neutral model (M7) and the selection  
8 model (M8).

### 9 **PSG GO enrichment and KEGG pathways analysis**

10 GO functional enrichment and KEGG pathway analyses were performed for genes shown to  
11 be under positive selection across the lineage of the schizothoracine fishes. GO enrichment  
12 analysis was performed using GOrseq (Young et al. 2010), which is based on a Wallenius non-  
13 central hyper-geometric distribution. KEGG pathways were analyzed using KOBAS v2.0.12  
14 (Xie et al. 2011), with FDR set to BH.

### 15 **Lineage-specific evolution of the key PSGs associated significantly enriched functions and** 16 **metabolite pathways**

17 Positive selection pressure on genes is one of the fundamental processes underlying adaptive  
18 changes in genes and genomes, resulting in evolutionary innovations and species differences  
19 (Marra et al. 2017). During speciation and dispersal, the different lineages (or species) of the  
20 schizothoracine fish have been subject to a variety of different selection pressures, including  
21 low temperatures, hypoxic conditions, intense ultraviolet radiation, and unique pathogens (Wu  
22 and Wu 1992; Qi et al. 2012). To investigate which of the key PSGs were associated with  
23 significantly enriched functions and metabolite pathways acting on specific lineages (or  
24 species), which may have driven the adaptation of specific taxa to local environmental conditions,  
25 we used branch-specific ML models (Zhang 2005). Branch-specific models allow the  $\omega$  ratio  
26 to vary among branches in a phylogeny, and are useful for detecting positive selection pressures  
27 acting on particular lineages. Thus, for the positively selected genes significantly enriched in  
28 GO terms and KEGG pathways, we evaluated the  $\omega$  ratio for every lineage of the



1 schizothoracine fish, using branch-specific ML models with branch labels.

2

## 3 **RESULTS**

### 4 **Illumina sequencing and de novo transcriptome assembly**

5 We generated 64,637,602–83,968,472 sequence reads for each of the 13 schizothoracine fish  
6 with Illumina sequencing. After trimming and filtering low-quality sequences, we obtained  
7 62,487,860–81,238,722 high-quality clean sequence reads for each of the 13 species. Due to  
8 the absence of genome information for the schizothoracine fishes, we de novo assembled the  
9 sequence reads using Trinity, obtaining 129,982–207,887 for each of the 13 species. Each of  
10 these transcripts included 95,251–145,805 unigenes (Table 1). Detailed unigene information is  
11 summarized in Supplementary Material 1.

12 **Table 1 Summary of transcriptome data for 13 schizothoracine fish**

| Species                  | Raw reads | Clean reads | Clean bases (Gb) | Transcripts | Unigenes |
|--------------------------|-----------|-------------|------------------|-------------|----------|
| <i>S. lantsangensis</i>  | 83968472  | 81238722    | 12.19            | 149827      | 107266   |
| <i>S. macropogon</i>     | 66249882  | 62964616    | 9.44             | 150512      | 109939   |
| <i>S. lissolabiatius</i> | 64637602  | 62875610    | 9.43             | 129982      | 95251    |
| <i>S. labiatius</i>      | 74677296  | 70975858    | 10.65            | 149487      | 111736   |
| <i>G. pachycheilus</i>   | 71034408  | 68403344    | 10.26            | 171564      | 125690   |
| <i>P. dipogon</i>        | 81626182  | 78155270    | 11.72            | 190151      | 125289   |
| <i>O. stewartii</i>      | 68519742  | 65848700    | 9.88             | 131558      | 99448    |
| <i>P. extremus</i>       | 80057188  | 75758954    | 11.36            | 166210      | 117964   |
| <i>S. pylzovi</i>        | 66998630  | 62487860    | 9.37             | 134550      | 96467    |
| <i>S. stoliczkai</i>     | 71929644  | 69194100    | 10.38            | 169946      | 121641   |
| <i>S. younghusbandi</i>  | 76338196  | 73209828    | 10.98            | 164357      | 116520   |
| <i>G. waddelli</i>       | 80912802  | 78367978    | 11.76            | 207887      | 145805   |
| <i>G. eckloni</i>        | 72359070  | 70142108    | 10.52            | 162235      | 110231   |

13

### 14 **Unigene annotation**

15 All of the unigene sets across the 13 schizothoracine fish were annotated based on similarity to  
16 sequences in six public databases. We found the largest number of unigene matches in the Nt

1 database, ranging from 115,232 (79.03%: *Gymnocypris waddelli*) to 85,026 (89.26%:  
2 *Schizothorax lissolabiatu*s). We found that 81.43%–90.94% of the unigenes from each species  
3 had a match in at least one database. We used the unigenes BLAST hits from the Nr database  
4 for subsequent analyses, as the Nr database had the maximum number of protein reference  
5 sequences per species (Table 2).

**Table 2 Functional annotation of unigenes for 13 schizothoracine fish.**

| Species                 | Nr             | Nt              | Swiss-Prot     | KEGG           | GO             | COG            | Total           |
|-------------------------|----------------|-----------------|----------------|----------------|----------------|----------------|-----------------|
| <i>S. lamsangensis</i>  | 36506 (30.04%) | 95438 (88.97%)  | 29097 (27.12%) | 18209 (16.97%) | 28577 (26.64%) | 17084 (15.92%) | 96925 (90.35%)  |
| <i>S. macropogon</i>    | 38093 (34.64%) | 97898 (89.04%)  | 30783 (28.0%)  | 19207 (17.47%) | 29542 (26.87%) | 17799 (16.18%) | 99454 (90.46%)  |
| <i>S. lissolabiatus</i> | 36571 (38.39%) | 85026 (89.26%)  | 30006 (31.5%)  | 19035 (19.98%) | 28284 (29.69%) | 17193 (18.05%) | 86623 (90.94%)  |
| <i>S. labiatus</i>      | 43895 (39.28%) | 99055 (88.65%)  | 35911 (32.13%) | 22916 (20.5%)  | 32614 (29.18%) | 19639 (17.57%) | 101007 (90.39%) |
| <i>G. pachycheilus</i>  | 36678 (29.18%) | 102017 (81.16%) | 30350 (24.14%) | 19180 (15.52%) | 30542 (24.29%) | 17831 (14.18%) | 104791 (83.37%) |
| <i>P. dipogon</i>       | 43240 (34.51%) | 101998 (81.41%) | 33871 (27.03%) | 20852 (16.64%) | 32562 (25.98%) | 19336 (15.43%) | 104812 (83.65%) |
| <i>O. stewartii</i>     | 37748 (37.95%) | 82070 (82.52%)  | 30815 (31.32%) | 19800 (19.9%)  | 28338 (28.49%) | 17364 (17.46%) | 84213 (84.68%)  |
| <i>P. extremus</i>      | 42824 (36.3%)  | 94790 (80.35%)  | 34494 (29.24%) | 22361 (18.95%) | 31591 (26.78%) | 18632 (15.79%) | 97520 (82.66%)  |
| <i>S. pylzovi</i>       | 42038 (43.57%) | 81162 (84.13%)  | 34629 (35.89%) | 22262 (23.07%) | 30444 (31.55%) | 19076 (19.77%) | 83356 (86.4%)   |
| <i>S. stoliczkaei</i>   | 37381 (30.73%) | 98143 (80.68%)  | 30118 (24.75%) | 18849 (15.49%) | 30213 (24.83%) | 17797 (14.63%) | 100900 (82.94%) |
| <i>S. younghusbandi</i> | 43254 (37.12%) | 94808 (81.36%)  | 35206 (30.21%) | 22452 (19.26%) | 33117 (28.42%) | 19961 (17.13%) | 97992 (84.09%)  |
| <i>G. waddelli</i>      | 41076 (28.17%) | 115232 (79.03%) | 32775 (22.47%) | 20568 (14.1%)  | 33045 (22.66%) | 18884 (16.95%) | 118732 (81.43%) |
| <i>G. eckloni</i>       | 34532 (31.32%) | 89171 (80.89%)  | 27505 (24.95%) | 16578 (15.0%)  | 28141 (25.52%) | 16869 (15.3%)  | 91554 (83.05)   |

## 1 **Functional annotation and classification**

2 Based on sequence homology against the Nr database, the 28,141 (*Gymnocypris eckloni*) to  
3 33,117 (*Schizopygopsis younghusbandi*) unigenes from the 13 schizothoracine fish were  
4 annotated to 56 GO categories (Table S2). Of these, there were 24 biological process (BP) sub-  
5 categories, 18 cellular component (CC) sub-categories, and 14 molecular function (MF) sub-  
6 categories. Binding (GO:0005488) was the most represented MF category; cellular process  
7 (GO:0009987) was the most represented BP category, and cell (GO:0005623) and cell part  
8 (GO:0044464) were the most represented CC categories (Supplementary Material 2).

9 We functionally classified 16,578 (*G. eckloni*) to 22,916 (*Schizothorax labiatus*) unigenes  
10 from the 13 schizothoracine fish into five KEGG categories and 32 functional sub-categories.  
11 Among the 32 subcategories, signal transduction were the most highly represented, followed  
12 by endocrine system, cell communication, nervous system, and immune system  
13 (Supplementary Material 3).

## 14 **Putative orthologs, phylogeny, and positively selected genes**

15 We divided 477,274 proteins from the 13 schizothoracine fish and two other fish species (*D.*  
16 *rerio* and *O. latipes*) into 52,508 orthologous groups (gene families) using OrthoMCL (Li et al.  
17 2003), following the self-self-comparison with BLASTP. After alignment and trimming for  
18 quality control, we compared the orthologous groups among the 13 fish species, and identified  
19 2,064 putative single-copy genes in each fish species. These single-copy genes were used in  
20 the subsequent phylogenetic and evolutionary analyses. The ML phylogenetic tree, based on  
21 2,064 orthologous genes, was well supported with 100% bootstrap values at all of the nodes  
22 (Figure 2). This ML tree was congruent with previous trees based on morphological characters  
23 (Wu and Wu 1992) and on mitochondrial genes (Saitoh et al. 2006; Qi et al. 2012).

24 Positive selection analysis pinpointed the genes that were associated with a functional or  
25 environmental shift. For the 2,064 orthologous genes that harbored both synonymous and non-  
26 synonymous substitutions, we identified 52 genes with Ka/Ks ratios >1, and 187 genes with  
27 Ka/Ks ratios between 0.5 and 1 (Table 3 and Figure 3). The 52 genes (with Ka/Ks ratios > 1)  
28 were considered candidate genes, that probably underwent positive selection along the

1 schizothoracine fish lineage, and which may have influenced the adaptation of these fish to the  
2 aquatic environment of the QTP (Table 3 and Figure 3).

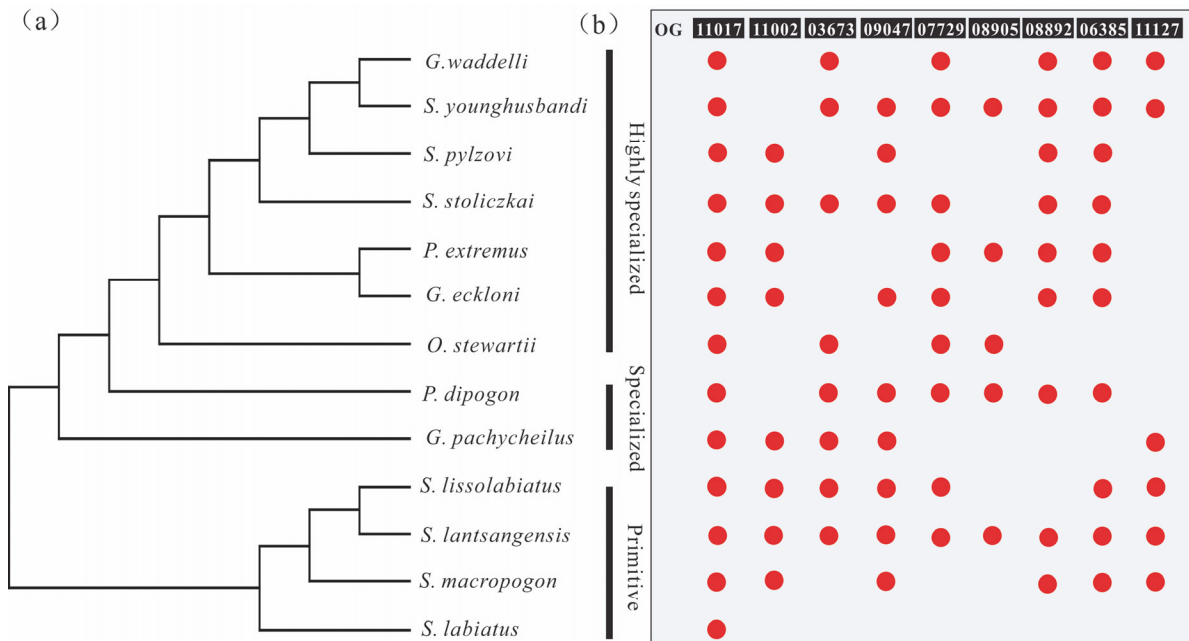

3  
4 **Figure 2** (a) Maximum likelihood (ML) phylogenetic tree, inferred based on 2064 orthologous genes. (b)  
5 Lineage-specific evolution test of the nine candidate positively selected genes (PSGs). Red dots represent  
6 genes with a Ka/Ks ratio >1 in a specific lineage.

7

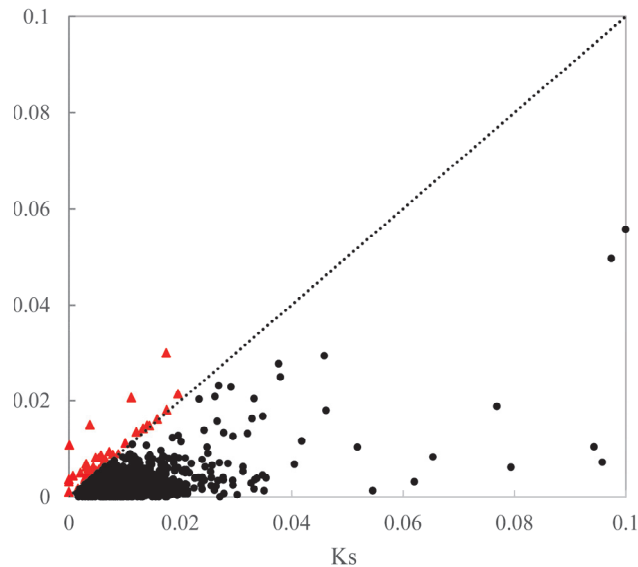

12

1  
2

**Table 3 Identification of candidate genes under positive selection ( $Ka/Ks > 1$ ).**

| Orthologous unigenes | Gene name                                                        | ka/ks |
|----------------------|------------------------------------------------------------------|-------|
| OG10207              | Immunoglobulin-like domain containing receptor 1b                | 999   |
| OG09786              | Uncharacterized protein LOC751751 isoform X1                     | 999   |
| OG11255              | Beta-catenin-interacting protein 1 (ICAT)                        | 999   |
| OG08139              | Extracellular matrix protein 2                                   | 999   |
| OG12459              | Photosystem II 10 kda polypeptide                                | 36.36 |
| OG09166              | ceramide galactosyltransferase (CGT)                             | 6.23  |
| OG11017              | C-C motif chemokine 25 (CCL25)                                   | 4.0   |
| OG11439              | Centrosomal protein of 164 kda                                   | 2.52  |
| OG12633              | Vasodilator-stimulated phosphoprotein (VASP)                     | 2.43  |
| OG07302              | Na(+)/H(+) exchange regulatory cofactor (NHE-RF2)                | 2.38  |
| OG08892              | Integral membrane protein 2B (IMP2B)                             | 2.20  |
| OG08559              | S100 calcium binding protein V2                                  | 1.99  |
| OG10756              | T cell receptor delta chain                                      | 1.85  |
| OG11002              | C-C motif chemokine 3 (CCL3)                                     | 1.72  |
| OG11268              | Protein S100-P                                                   | 1.72  |
| OG07173              | Complement component 8 alpha (C8A)                               | 1.67  |
| OG09053              | Nuclear-pore anchor-like                                         | 1.52  |
| OG09012              | Myozenin-1                                                       | 1.51  |
| OG12805              | Uncharacterized protein LOC103909146 isoform X2                  | 1.42  |
| OG07743              | FXFD domain-containing ion transport regulator 5-like isoform X1 | 1.41  |
| OG04895              | Chchd3 protein                                                   | 1.35  |
| OG09047              | Interleukin 2 receptor, gamma (IL2RG)                            | 1.31  |
| OG07177              | Etratricopeptide repeat protein 9C                               | 1.28  |
| OG09992              | Regulator of cell cycle RGCC isoform X2                          | 1.26  |
| OG06385              | Interleukin-12 alpha chain                                       | 1.21  |
| OG10887              | Pancreatic secretory trypsin inhibitor                           | 1.20  |
| OG08016              | ETS domain-containing protein Elk-1 (ELK-1)                      | 1.14  |
| OG11127              | Interleukin-34                                                   | 1.13  |
| OG05509              | Cystatin                                                         | 1.13  |
| OG07729              | Interferon receptor 1 (IFNAR1)                                   | 1.12  |
| OG12954              | Small lysine-rich protein 1                                      | 1.12  |
| OG07825              | UDP-N-acetylglucosamine transferase subunit ALG14 homolog        | 1.11  |
| OG08844              | Apolipoprotein C Ia                                              | 1.10  |
| OG05561              | Prostate stem cell antigen                                       | 1.10  |
| OG09068              | Actin-related protein 2/3 complex subunit 3                      | 1.09  |
| OG09729              | Scotin                                                           | 1.08  |
| OG09300              | Transmembrane protein 218                                        | 1.07  |
| OG10138              | Mitochondrial import inner membrane translocase subunit Tim8 A   | 1.06  |
| OG09446              | CD63 antigen (CD63)                                              | 1.06  |
| OG11026              | Uncharacterized protein LOC768128 isoform X1                     | 1.05  |

|         |                                                                         |      |
|---------|-------------------------------------------------------------------------|------|
| OG09034 | Protein FAM134C                                                         | 1.05 |
| OG11081 | Uncharacterized protein LOC570390                                       | 1.04 |
| OG07221 | CD302 antigen                                                           | 1.04 |
| OG03673 | C-C motif chemokine 8 (CCL8)                                            | 1.03 |
| OG08905 | Eukaryotic translation initiation factor 2-alpha kinase 1 (EIF2AK1)     | 1.03 |
| OG02854 | Multidrug resistance-associated protein 1                               | 1.03 |
| OG12777 | Mucin-2-like                                                            | 1.02 |
| OG07502 | Asparagine--tRNA ligase synthetase (asnS)                               | 1.02 |
| OG09775 | Epithelial membrane protein 2 isoform X1                                | 1.02 |
| OG11590 | Nuclear factor, interleukin 3 regulated, member 2                       | 1.01 |
| OG12581 | Light harvesting complex protein LHCII-3                                | 1.01 |
| OG07693 | Dual specificity tyrosine-phosphorylation-regulated kinase 4 isoform X2 | 1.01 |

1

## 2 **PSG functions and metabolite pathways**

3 To detect genes that might be involved in the adaptation to diverse aquatic environments in the  
4 QTP, we performed GO functional enrichment and KEGG pathways analysis on the 52 PSGs  
5 with orthologous unigenes.

6 Our GO enrichment analysis identified six PSGs (OG03673, OG08892, OG11017,  
7 OG06385, OG11002, and OG11127) that were significantly enriched in four molecular  
8 functions (cytokine activity, cytokine receptor binding, chemokine activity, and chemokine  
9 receptor binding), and one biological process (immune response; Table 4). KEGG enrichment  
10 analysis indicated that six PSGs (OG03673, OG09047, OG07729, OG11002, OG11017, and  
11 OG08905) were significantly enriched in two KEGG pathways (cytokine-cytokine receptor  
12 interaction and measles) (Table 5 and Figure 4). Thus, we identified nine candidate PSGs in  
13 the schizothoracine fish that may be involved in the adaptation to diverse aquatic environments.  
14 Notably, all nine of the candidate PSGs were related to fish innate and/or adaptive immunity.

15 The lineage-specific evolution test of the nine candidate PSGs indicated that different  
16 candidate PSGs acted more strongly on different specific lineages or species, as compared to  
17 other lineages or species (Figure 2). For example, of the 13 species, *S. lantsangensis* possessed  
18 the most PSGs (nine), followed by *Ptychobarbus dipogon*, *S. younghusbandi*, and *S. stoliczkai*  
19 (eight PSGs), while *S. labiatus* had the fewest PSGs (one).

20



1 **Table 4 Key PSGs involved in the significantly enriched GO functions.**

| GO accession | GO terms                   | GO type | Positively selected genes                   |
|--------------|----------------------------|---------|---------------------------------------------|
| GO:0005125   | Cytokine activity          | MF      | OG03673, OG08892, OG11017, OG06385, OG11002 |
| GO:0005126   | Cytokine receptor binding  | MF      | OG11017, OG11002, OG06385, OG11127, OG03673 |
| GO:0008009   | Chemokine activity         | MF      | OG11017, OG11002, OG03673                   |
| GO:0042379   | Chemokine receptor binding | MF      | OG03673, OG11017, OG11002                   |
| GO:0006955   | Immune response            | BP      | OG03673, OG08892, OG11017, OG06385, OG11002 |

2

3 **Table 5 Key PSGs involved in the significantly enriched KEGG pathways.**

|               | KEGG pathway                           | ID      | Positively selected genes                   |
|---------------|----------------------------------------|---------|---------------------------------------------|
| Immune system | Cytokine-cytokine receptor interaction | ko04060 | OG07729, OG11002, OG03673, OG09047, OG11017 |
| Immune system | Measles                                | ko05162 | OG07729, OG08905, OG09047                   |
| Immune system | Chemokine signaling pathway            | ko04062 | OG11002, OG03673, OG11017                   |

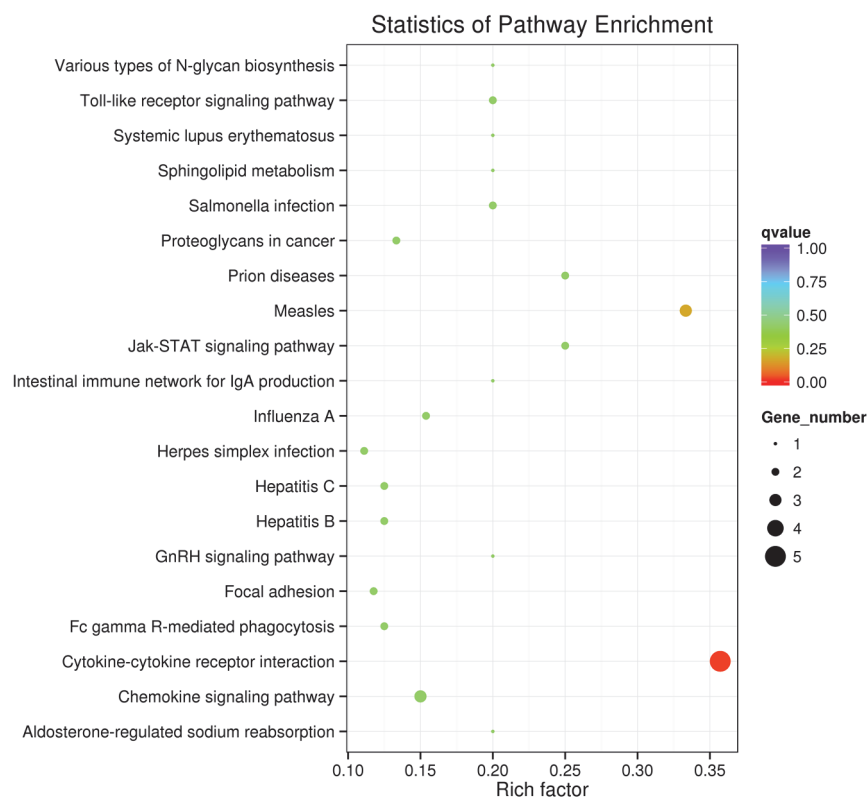

4

5 **Figure 4** An overview of the KEGG pathways significantly enriched in the 52 PSGs. Specific pathways are

6 plotted along the y-axis, and the x-axis indicates the enrichment factor. The size each colored dot indicates

1 the number of candidate PSGs associated with each corresponding pathway: pathways with larger-sized dots  
2 contain a larger numbers of genes. The color of the each dot indicates the corrected  $P$ -value for the  
3 corresponding pathway.

4  
5

## 6 **DISCUSSION**

7 A better understanding of fish genetics will provide key insights into the adaptation of fish to  
8 diverse aquatic environments in the QTP, and thus increase our knowledge of the molecular  
9 mechanisms underlying the speciation, dispersal, and current distribution of the freshwater fish  
10 endemic to the QTP. Previous studies, comparing the transcriptomics of single QTP fish species  
11 of QTP to other low-land species, have identified a set of candidate genes related to energy  
12 metabolism and hypoxia response in freshwater fish in the QTP (Yang et al. 2014; Tong et al.  
13 2017). Here, our aim was to characterize interspecific transcriptomic differences within the  
14 subfamily Schizothoracinae, and, more specifically, to identify the key PSGs involved in the  
15 significantly enriched functions and metabolite pathways acting on the specific lineages (or  
16 species). In this way, we aimed to investigate the genetic basis underlying the adaptation of this  
17 subfamily to local aquatic environments. As part of our study, we also sequenced and  
18 assembled merged-tissue transcriptomes of 13 schizothoracine species, providing an important  
19 genetic resource that was previously lacking.

20 Transcriptome quality is usually influenced by the method of library construction and the  
21 sequencing platform. Our assembly statistics indicated that the species with the greatest number  
22 of sequencing reads yielded more assembled transcripts, unigenes, and annotated open reading  
23 frames (ORFs). Our merged transcriptomes yielded 95,251–145,805 unigenes for each of the  
24 13 schizothoracine species, which is consistent with a previous report of single-tissue RNA-  
25 seq data from *Gymnocypris przewalskii* (Zhang et al. 2015), but far greater than multiple-tissue  
26 merged transcriptomes from *Gymnodiptychus pachycheilus* (Yang et al. 2014), *G. przewalskii*  
27 (Tong et al. 2017), and glyptosternoid fish (Ma et al. 2015; Kang et al. 2017). The N50 values  
28 across the 13 species were similar, ranging between 1,030 and 1,567 kb (mean length ranging  
29 from 635–745 bp; Table S1). These N50 values were slightly smaller than those of *G.*

1 *przewalskii* (Tong et al. 2017) but consistent with most recent comparative transcriptome  
2 studies in fish (Yang et al. 2014; Ma et al. 2015; Kang et al. 2017).

3 The number of Nr annotations was similar across the 13 species (ranging from 34,532 to  
4 43,254; Table 2), and consistent with estimates for single-tissue RNA-seq data in *G. przewalskii*  
5 [17]. However, the number of Nr annotations recovered here was far greater than multiple-  
6 tissue merged transcriptomes produced for other fish species (Yang et al. 2014; Ma et al. 2015;  
7 Kang et al. 2017; Tong et al. 2017). Out of the 95,251–145,805 assembled unigenes from the  
8 13 species, we annotated 81.43%–90.94% against six public databases. Unigenes without  
9 significant hits may be orphan genes, noncoding RNAs, untranslated transcripts, or  
10 misassembled transcripts. Thus, there might have been orphan genes specific to the  
11 schizothoracine fish (Yang et al. 2014), which might have rapidly evolved, taking indispensable  
12 biological roles and contributing to lineage-specific phenotypes and adaptations (Chen et al.  
13 2013). Relatively few shared orthologs were identified because large interspecific comparisons  
14 are still somewhat nascent. Even so, we identified 2,064 orthologous genes in 13  
15 schizothoracine species, which were fewer than that identified in two congeneric species of  
16 naked carp (Zhang et al. 2015), but the amount was consistent with similar comparative  
17 transcriptome studies in other fish species (Yang et al. 2014; Ma et al. 2015; Tong et al. 2017).  
18 Thus, we have here obtained a set of high quality transcriptomic resources, which are  
19 appropriate for further comparative genomic analyses when genome sequencing data are not  
20 available.

21 The schizothoracine fish (Teleostei: Cyprinidae) are the largest and most diverse taxon of  
22 the QTP ichthyofauna (Wu and Wu 1992; Chen and Cao 2000). Previous studies have  
23 demonstrated that the uplifting of the QTP from 50 MYA had a profound effect on drainage  
24 patterns and changed the environment of the plateau substantially, promoting the speciation of  
25 the schizothoracine fish endemic to the region (Li et al. 2013; Qi et al. 2015). Previous studies  
26 based on comprehensive transcriptomes have shown that genes associated with energy  
27 metabolism and the hypoxia response underwent significantly accelerated or adaptive  
28 evolution in the schizothoracine fish, as compared to other teleost fish from the plains (Yang et  
29 al. 2014; Tong et al. 2017). Here, we identified 2,064 orthologous genes from the 13

1 schizothoracine fish. Of these, we identified 52 genes as candidate genes. These candidate  
2 genes have probably undergone positive selection along the whole schizothoracine fish lineage.  
3 We then found that nine candidate PSGs were significantly enriched in several key GO  
4 functions and metabolite pathways. Interestingly, all of the functions and metabolite pathways  
5 significantly enriched in the schizothoracine fish were associated with the immune system,  
6 which was inconsistent with previous studies of the schizothoracine fish (Yang et al. 2014;  
7 Tong et al. 2017). This discrepancy may be because previous studies focused on comparative  
8 transcriptomics between the schizothoracine fish and other teleost fishes from the plains,  
9 instead of interspecies comparisons within schizothoracine fish.

10 Fish immune function is known to be associated with habitat structure (Bowden 2008;  
11 Diepeveen et al. 2013). During the colonization of ecologically novel drainages or upon the  
12 exploitation of vacant ecological niches, selection on immune-related genes can be particularly  
13 strong as fishes encounter different pathogens (Birrer et al. 2012). Here, we identified nine  
14 candidate PSGs that were significantly enriched into five GO functions and two KEGG  
15 pathways. All of the enriched GO functions were related to the immune system, including  
16 cytokine activity, cytokine receptor binding, chemokine activity, chemokine receptor binding,  
17 and immune response. These results were supported by our KEGG pathway analysis.

18 Cytokines are a family of low-molecular-weight proteins that are secreted by activated  
19 immune-related cells upon induction by various parasitic, bacterial, or viral pathogens (Salazar-  
20 Mather and Hokeness 2006). Cytokines regulate the immune response as autocrines or  
21 paracrines by binding to the appropriate receptors (Zhu et al. 2013a). Cytokines are divided  
22 into interferons (IFNs), interleukins (ILs), tumor necrosis factors (TNFs), colony-stimulating  
23 factors, and chemokines; cytokines are secreted by various types of immune cells, including  
24 macrophages, lymphocytes, granulocytes, dendritic cells, mast cells, and epithelial cells  
25 (Salazar-Mather and Hokeness 2006). Therefore, cytokines have been catalogued as key  
26 regulators of the immune response, acting as a bridge between innate and adaptive responses  
27 (Alejo and Tafalla 2011). Here, seven of the nine candidate PSGs that were significantly  
28 enriched in GO functions and KEGG pathways were either cytokines or cytokine receptors,  
29 including interferon receptor 1 (IFNAR1, OG07729), C-C motif chemokine 25 (CCL25,

1 OG11017), C-C motif chemokine 3 (CCL3, OG11002), C-C motif chemokine 8 (CCL8,  
2 OG03673), interleukin-34 (IL-34, OG11127), interleukin 2 receptor, gamma (IL2RG,  
3 OG09047), and interleukin-12 alpha chain (IL-12, OG06385).

4 Chemokines are early-response, chemotactic members of cytokine family secreted by  
5 infected tissue cells (Salazar-Mather and Hokeness 2006; Alejo and Tafalla 2011; Bird and  
6 Tafalla 2015). Chemokines recruit monocytes, neutrophils, and other effector cells from blood  
7 vessels to the infection site (Rajesh 2016). In fish, CCL3, CCL8, and CCL25 have been shown  
8 to play important roles in the recruitment of monocytes and leukocytes, as well as in the  
9 induction of the inflammatory response to microbial invasion (de Oliveira et al. 2013; de  
10 Oliveira et al. 2015).

11 Interleukins, the largest group of cytokines, are associated with both pro- and anti-  
12 inflammatory functions (Rajesh 2016). For example, IL-12 is produced primarily by antigen  
13 presenting cells (APC), such as macrophages, dendritic cells, and B cells; however, this  
14 cytokine is indispensable for macrophage, neutrophil, and lymphocyte recruitment to infected  
15 tissues and for the activation of these cells as pathogen eliminators (Svanborg et al. 1999). In  
16 fish, IL-34 expression is sensitive to inflammatory stimuli and may regulate macrophage  
17 biology (Wang et al. 2013).

18 Interferons (IFNs) are secreted proteins that may induce an antiviral state in cells, and that,  
19 in vertebrates, play a major role in antiviral defense (Samuel 2001). During viral infections,  
20 IFNs bind to the IFN receptors (IFNARs), which trigger signal transduction through the JAK-  
21 STAT signal transduction pathway, resulting in the expression of Mx and other antiviral  
22 proteins (Samuel 2001).

23 The schizothoracine fish are widely distributed in drainages throughout the QTP (Wu and  
24 Wu 1992; Chen and Cao 2000). Although there is little information about fish pathogens in the  
25 QTP, the different aquatic environments of the QTP may have different microbial populations  
26 and, thus, potentially unique pathogens. Even in the same drainage system, pathogens may be  
27 unique to a given micro-ecosystem due to differences in dissolved oxygen, ultraviolet radiation,  
28 and physical and chemical properties of the water. Thus, different schizothoracine fish are

1 inevitably under selective pressures from new pathogens during the colonization of  
2 ecologically novel drainages or upon the exploitation of vacant ecological niches. Here, our  
3 lineage-specific test of the evolution of the nine candidate PSGs indicated that species from the  
4 same drainage shared more of the same PSGs. However, these PSGs also had species-specific  
5 features due to ecological differences among drainages, as well as among micro-habitats in the  
6 same drainage (e.g., benthic and pelagic). For example, of the four species collected from the  
7 Tsangpo River (*S. younghusbandi*, *P. dipogon*, *Schizothorax macropogon*, and  
8 *Oxygymnocypris stewartii*), three (*S. younghusbandi*, *P. dipogon*, and *S. macropogon*) are  
9 benthic (Wu and Wu 1992; Chen and Cao 2000; Qi et al. 2012). However, *S. younghusbandi*  
10 and *P. dipogon* share only eight PSGs, while *S. macropogon* shares only six. *O. stewartii*, a  
11 pelagic fish, shares four PSGs with *S. younghusbandi*, *P. dipogon*, and *S. macropogon*. Similar  
12 patterns were observed in the fish species from the Yellow River.

13 Fish are armed with less-developed adaptive immune systems as compared to those of  
14 mammals (Meng et al. 2012). The innate immune system plays an important role in fish, acting  
15 to rapidly eliminate pathogens, including bacteria and parasites, as the first line of defense  
16 against infection (Zhu et al. 2013b; Tong et al. 2017). The previous comparative  
17 transcriptomics of the schizothoracine fish and other teleost fish from the plains (Yang et al.  
18 2014; Tong et al. 2017), together with our findings based on interspecific transcriptomic  
19 comparisons within the schizothoracine fish, suggested that genes associated with energy  
20 metabolism and the hypoxia response in the schizothoracine have been subjected to accelerated  
21 or adaptive evolution. These genes may have been critical for the adaptation of the  
22 schizothoracine fish to the cold and hypoxic environment of the uplifted QTP. In addition, the  
23 adaptive evolution of immune genes may have allowed the fish species to colonize ecologically  
24 novel environments or to exploit vacant ecological niches during speciation.

25 In summary, we assembled the transcriptomes of 13 schizothoracine fish. The genetic  
26 adaptation of these fish to local aquatic environments during speciation was investigated, based  
27 on an interspecific comparative analysis of the transcriptomes. We identified nine PSGs (out  
28 of 52) that were significantly enriched in immune system-related functions and metabolite  
29 pathways, which indicated that species-specific differences may have evolved in response to

1 different ecological environments and to different living habits (e.g., benthic or pelagic). Our  
2 results suggested that the adaptive evolution of immune genes allowed new schizothoracine  
3 species to colonize ecologically novel environments or to exploit vacant ecological niches  
4 during speciation.

5

## 6 **ACKNOWLEDGMENTS**

7 This work was supported by grants from the National Natural Science Foundation of China  
8 (31460094) and the Natural Science Foundation of Qinghai Science & Technology Department  
9 in China (2015-ZJ-901). We thank LetPub ([www.letpub.com](http://www.letpub.com)) for its linguistic assistance  
10 during the preparation of this manuscript.

11



## LITERATURE CITED

- Alejo, A., and C. Tafalla, 2011 Chemokines in teleost fish species. *Dev Comp Immunol* 35 (12):1215-1222.
- Altschul, S.F., T.L. Madden, A.A. Schaffer, J. Zhang, Z. Zhang *et al.*, 1997 Gapped BLAST and PSI-BLAST: a new generation of protein database search programs. *Nucleic Acids Res* 25 (17):3389-3402.
- Baack, E.J., and M.L. Stanton, 2005 Ecological factors influencing tetraploid speciation in snow buttercups (*Ranunculus Adoneus*): niche differentiation and tetraploid establishment. *Evolution* 59 (9):1936-1944.
- Bird, S., and C. Tafalla, 2015 Teleost Chemokines and Their Receptors. *Biology (Basel)* 4 (4):756-784.
- Birrer, S.C., T.B. Reusch, and O. Roth, 2012 Salinity change impairs pipefish immune defence. *Fish Shellfish Immunol* 33 (6):1238-1248.
- Bowden, T.J., 2008 Modulation of the immune system of fish by their environment. *Fish Shellfish Immunol* 25 (4):373-383.
- Cai, Q., X. Qian, Y. Lang, Y. Luo, J. Xu *et al.*, 2013 Genome sequence of ground tit *Pseudopodoces humilis* and its adaptation to high altitude. *Genome Biol* 14 (3):R29.
- Cao, W.X., Y.Y. Chen, Y.F. Wu, and S.Q. Zhu, 1981 Origin and evolution of schizothoracine fishes in relation to the upheaval of the Xizang Plateau, in Collection in Studies on the Period, Amplitude and Type of the Uplift of the Qinghai-Xizang Plateau pp. 118-130 in *Studies on the Period, Amplitude and Type of the Uplift of the Qinghai-Xizang Plateau*, edited by C.A.o.S. The Team of the Comprehensive Scientific Expedition to the Qinghai-Xizang Plateau. Science Press, Beijing.
- Castresana, J., 2000 Selection of conserved blocks from multiple alignments for their use in phylogenetic analysis. *Mol Biol Evol* 17 (4):540-552.
- Chen, S., B.H. Krinsky, and M. Long, 2013 New genes as drivers of phenotypic evolution. *Nat Rev Genet* 14 (9):645-660.
- Chen, Y.F., and W.Y. Cao, 2000 Schizothoracinae, pp. 273-390. in *Fauna Sinica, Osteichthyes, Cypriniformes III.*, edited by P.Q. Yue. Science Press, Beijing.
- Collin, H., and L. Fumagalli, 2011 Evidence for morphological and adaptive genetic divergence between lake and stream habitats in European minnows (*Phoxinus phoxinus*, Cyprinidae). *Mol Ecol* 20 (21):4490-4502.
- de Oliveira, S., A. Lopez-Munoz, F.J. Martinez-Navarro, J. Galindo-Villegas, V. Mulero *et al.*, 2015 Cxcl8-11 and Cxcl8-12 are required in the zebrafish defense against *Salmonella Typhimurium*. *Dev Comp Immunol* 49 (1):44-48.
- de Oliveira, S., C.C. Reyes-Aldasoro, S. Candel, S.A. Renshaw, V. Mulero *et al.*, 2013 Cxcl8 (IL-8) mediates neutrophil recruitment and behavior in the zebrafish inflammatory response. *J Immunol* 190 (8):4349-4359.
- Diepeveen, E.T., O. Roth, and W. Salzburger, 2013 Immune-related functions of the *Hivep* gene family in East African cichlid fishes. *G3 (Bethesda)* 3 (12):2205-2217.
- Edgar, R.C., 2004 MUSCLE: multiple sequence alignment with high accuracy and high throughput. *Nucleic Acids Res* 32 (5):1792-1797.

- Funk, D.J., K.E. Filchak, and J.L. Feder, 2002 Herbivorous insects: model systems for the comparative study of speciation ecology. *Genetica* 116 (2-3):251-267.
- Gotz, S., J.M. Garcia-Gomez, J. Terol, T.D. Williams, S.H. Nagaraj *et al.*, 2008 High-throughput functional annotation and data mining with the Blast2GO suite. *Nucleic Acids Res* 36 (10):3420-3435.
- Grabherr, M.G., B.J. Haas, M. Yassour, J.Z. Levin, D.A. Thompson *et al.*, 2011 Full-length transcriptome assembly from RNA-Seq data without a reference genome. *Nat Biotechnol* 29 (7):644-652.
- Guan, L., W. Chi, W. Xiao, L. Chen, and S. He, 2014 Analysis of hypoxia-inducible factor alpha polyploidization reveals adaptation to Tibetan Plateau in the evolution of schizothoracine fish. *BMC Evol Biol* 14:192.
- Kang, J., X. Ma, and S. He, 2017 Evidence of high-altitude adaptation in the glyptosternoid fish, *Creteuchiloglanis macropterus* from the Nujiang River obtained through transcriptome analysis. *BMC Evol Biol* 17 (1):229.
- Kirkpatrick, M., and N. Barton, 2006 Chromosome inversions, local adaptation and speciation. *Genetics* 173 (1):419-434.
- Li, L., C.J. Stoeckert, Jr., and D.S. Roos, 2003 OrthoMCL: identification of ortholog groups for eukaryotic genomes. *Genome Res* 13 (9):2178-2189.
- Li, Y., Z. Ren, A.M. Shedlock, J. Wu, L. Sang *et al.*, 2013 High altitude adaptation of the schizothoracine fishes (Cyprinidae) revealed by the mitochondrial genome analyses. *Gene* 517 (2):169-178.
- Ma, X., W. Dai, J. Kang, L. Yang, and S. He, 2015 Comprehensive Transcriptome Analysis of Six Catfish Species from an Altitude Gradient Reveals Adaptive Evolution in Tibetan Fishes. *G3 (Bethesda)* 6 (1):141-148.
- Malinsky, M., R.J. Challis, A.M. Tyers, S. Schiffels, Y. Terai *et al.*, 2015 Genomic islands of speciation separate cichlid ecomorphs in an East African crater lake. *Science* 350 (6267):1493-1498.
- Marra, N.J., V.P. Richards, A. Early, S.M. Bogdanowicz, P.D. Pavinski Bitar *et al.*, 2017 Comparative transcriptomics of elasmobranchs and teleosts highlight important processes in adaptive immunity and regional endothermy. *BMC Genomics* 18 (1):87.
- Meng, F., Y. Sun, X. Liu, J. Wang, T. Xu *et al.*, 2012 Analysis of C3 suggests three periods of positive selection events and different evolutionary patterns between fish and mammals. *PLoS One* 7 (5):e37489.
- Nosil, P., L.J. Harmon, and O. Seehausen, 2009 Ecological explanations for (incomplete) speciation. *Trends Ecol Evol* 24 (3):145-156.
- Qi, D., Y. Chao, S. Guo, L. Zhao, T. Li *et al.*, 2012 Convergent, parallel and correlated evolution of trophic morphologies in the subfamily schizothoracinae from the Qinghai-Tibetan plateau. *PLoS One* 7 (3):e34070.
- Qi, D., T. Li, X. Zhao, S. Guo, and J. Li, 2006 Mitochondrial cytochrome b sequence variation and phylogenetics of the highly specialized Schizothoracine fishes (Teleostei: Cyprinidae) in the Qinghai-Tibet plateau. *Biochem Genet* 44 (5-6):270-285.
- Qi, D.L., S.C. Guo, Y. Chao, Q.H. Kong, C.Z. Li *et al.*, 2015 The biogeography and phylogeny of

- schizothoracine fishes (Schizopygopsis) in the Qinghai-Tibetan Plateau. *Zoologica Scripta* 44 (5):523-533.
- Qu, Y., H. Zhao, N. Han, G. Zhou, G. Song *et al.*, 2013 Ground tit genome reveals avian adaptation to living at high altitudes in the Tibetan plateau. *Nat Commun* 4:2071.
- Rajesh, P., Prasanth, B. Venkatesh, K. Mukesh, P. Jesu, A., 2016 Innate and adaptive immune molecules of striped murrel *Channa striatus*. *Reviews in Aquaculture* 0:1-24.
- Rocha, L.A., D.R. Robertson, J. Roman, and B.W. Bowen, 2005 Ecological speciation in tropical reef fishes. *Proc Biol Sci* 272 (1563):573-579.
- Saitoh, K., T. Sado, R.L. Mayden, N. Hanzawa, K. Nakamura *et al.*, 2006 Mitogenomic evolution and interrelationships of the Cypriniformes (Actinopterygii: Ostariophysi): the first evidence toward resolution of higher-level relationships of the world's largest freshwater fish clade based on 59 whole mitogenome sequences. *J Mol Evol* 63 (6):826-841.
- Salazar-Mather, T.P., and K.L. Hokeness, 2006 Cytokine and chemokine networks: pathways to antiviral defense. *Curr Top Microbiol Immunol* 303:29-46.
- Samuel, C.E., 2001 Antiviral actions of interferons. *Clin Microbiol Rev* 14 (4):778-809, table of contents.
- Svanborg, C., G. Godaly, and M. Hedlund, 1999 Cytokine responses during mucosal infections: role in disease pathogenesis and host defence. *Curr Opin Microbiol* 2 (1):99-105.
- Tamura, K., G. Stecher, D. Peterson, A. Filipski, and S. Kumar, 2013 MEGA6: Molecular Evolutionary Genetics Analysis version 6.0. *Mol Biol Evol* 30 (12):2725-2729.
- Tatusov, R.L., N.D. Fedorova, J.D. Jackson, A.R. Jacobs, B. Kiryutin *et al.*, 2003 The COG database: an updated version includes eukaryotes. *BMC Bioinformatics* 4:41.
- Tong, C., T. Fei, C. Zhang, and K. Zhao, 2017 Comprehensive transcriptomic analysis of Tibetan Schizothoracinae fish *Gymnocypris przewalskii* reveals how it adapts to a high altitude aquatic life. *BMC Evol Biol* 17 (1):74.
- Tong, C., C. Zhang, R. Zhang, and K. Zhao, 2015 Transcriptome profiling analysis of naked carp (*Gymnocypris przewalskii*) provides insights into the immune-related genes in highland fish. *Fish Shellfish Immunol* 46 (2):366-377.
- Tonnis, B., P.R. Grant, B.R. Grant, and K. Petren, 2005 Habitat selection and ecological speciation in Galapagos warbler finches (*Certhidea olivacea* and *Certhidea fusca*). *Proc Biol Sci* 272 (1565):819-826.
- Wang, T., T. Kono, M.M. Monte, H. Kuse, M.M. Costa *et al.*, 2013 Identification of IL-34 in teleost fish: differential expression of rainbow trout IL-34, MCSF1 and MCSF2, ligands of the MCSF receptor. *Mol Immunol* 53 (4):398-409.
- Wu, Y.F., and C.Z. Wu, 1992 *The fishes of the Qinghai – Xizang plateau*. Chengdu: Science and Technology Press.
- Xie, C., X. Mao, J. Huang, Y. Ding, J. Wu *et al.*, 2011 KOBAS 2.0: a web server for annotation and identification of enriched pathways and diseases. *Nucleic Acids Res* 39 (Web Server issue):W316-322.

- Xu, J., J.T. Li, Y. Jiang, W. Peng, Z. Yao *et al.*, 2017 Genomic Basis of Adaptive Evolution: The Survival of Amur Ide (*Leuciscus waleckii*) in an Extremely Alkaline Environment. *Mol Biol Evol* 34 (1):145-159.
- Yang, J., X. Chen, J. Bai, D. Fang, Y. Qiu *et al.*, 2016 The Sinocyclocheilus cavefish genome provides insights into cave adaptation. *BMC Biol* 14:1.
- Yang, L., Y. Wang, Z. Zhang, and S. He, 2014 Comprehensive transcriptome analysis reveals accelerated genic evolution in a Tibet fish, *Gymnodiptychus pachycheilus*. *Genome Biol Evol* 7 (1):251-261.
- Yang, Z., 2007 PAML 4: phylogenetic analysis by maximum likelihood. *Mol Biol Evol* 24 (8):1586-1591.
- Yang, Z., W.S. Wong, and R. Nielsen, 2005 Bayes empirical bayes inference of amino acid sites under positive selection. *Mol Biol Evol* 22 (4):1107-1118.
- Yang, Z.H., and R. Nielsen, 2002 Codon-substitution models for detecting molecular adaptation at individual sites along specific lineages. *Mol Biol Evol* 19: 908–917.
- Young, M.D., M.J. Wakefield, G.K. Smyth, and A. Oshlack, 2010 Gene ontology analysis for RNA-seq: accounting for selection bias. *Genome Biol* 11 (2):R14.
- Zhang, J.Z., Nielsen, R., Yang, Z.H., 2005 Evaluation of an improved branch-site likelihood method for detecting positive selection at the molecular level. *Mol Biol Evol* 22:2472–2479.
- Zhang, R., A. Ludwig, C. Zhang, C. Tong, G. Li *et al.*, 2015 Local adaptation of *Gymnocypris przewalskii* (Cyprinidae) on the Tibetan Plateau. *Sci Rep* 5:9780.
- Zhang, R., Z. Peng, G. Li, C. Zhang, Y. Tang *et al.*, 2013 Ongoing speciation in the Tibetan plateau *Gymnocypris* species complex. *PLoS One* 8 (8):e71331.
- Zhou, W.W., Y. Wen, J. Fu, Y.B. Xu, J.Q. Jin *et al.*, 2012 Speciation in the *Rana chensinensis* species complex and its relationship to the uplift of the Qinghai-Tibetan Plateau. *Mol Ecol* 21 (4):960-973.
- Zhu, L.Y., L. Nie, G. Zhu, L.X. Xiang, and J.Z. Shao, 2013a Advances in research of fish immune-relevant genes: a comparative overview of innate and adaptive immunity in teleosts. *Dev Comp Immunol* 39 (1-2):39-62.
- Zhu, Z., Y. Sun, R. Wang, and T. Xu, 2013b Evolutionary analysis of TLR9 genes reveals the positive selection of extant teleosts in Perciformes. *Fish Shellfish Immunol* 35 (2):448-457.
